# Supplementary material for: KRAS Mutations Impact Clinical Outcome in Metastatic Non-Small Cell Lung Cancer
Source: MDPI journal article supplement (doi:10.3390/cancers14092063), 2022-04-20
Supplement: s1 [file s1]

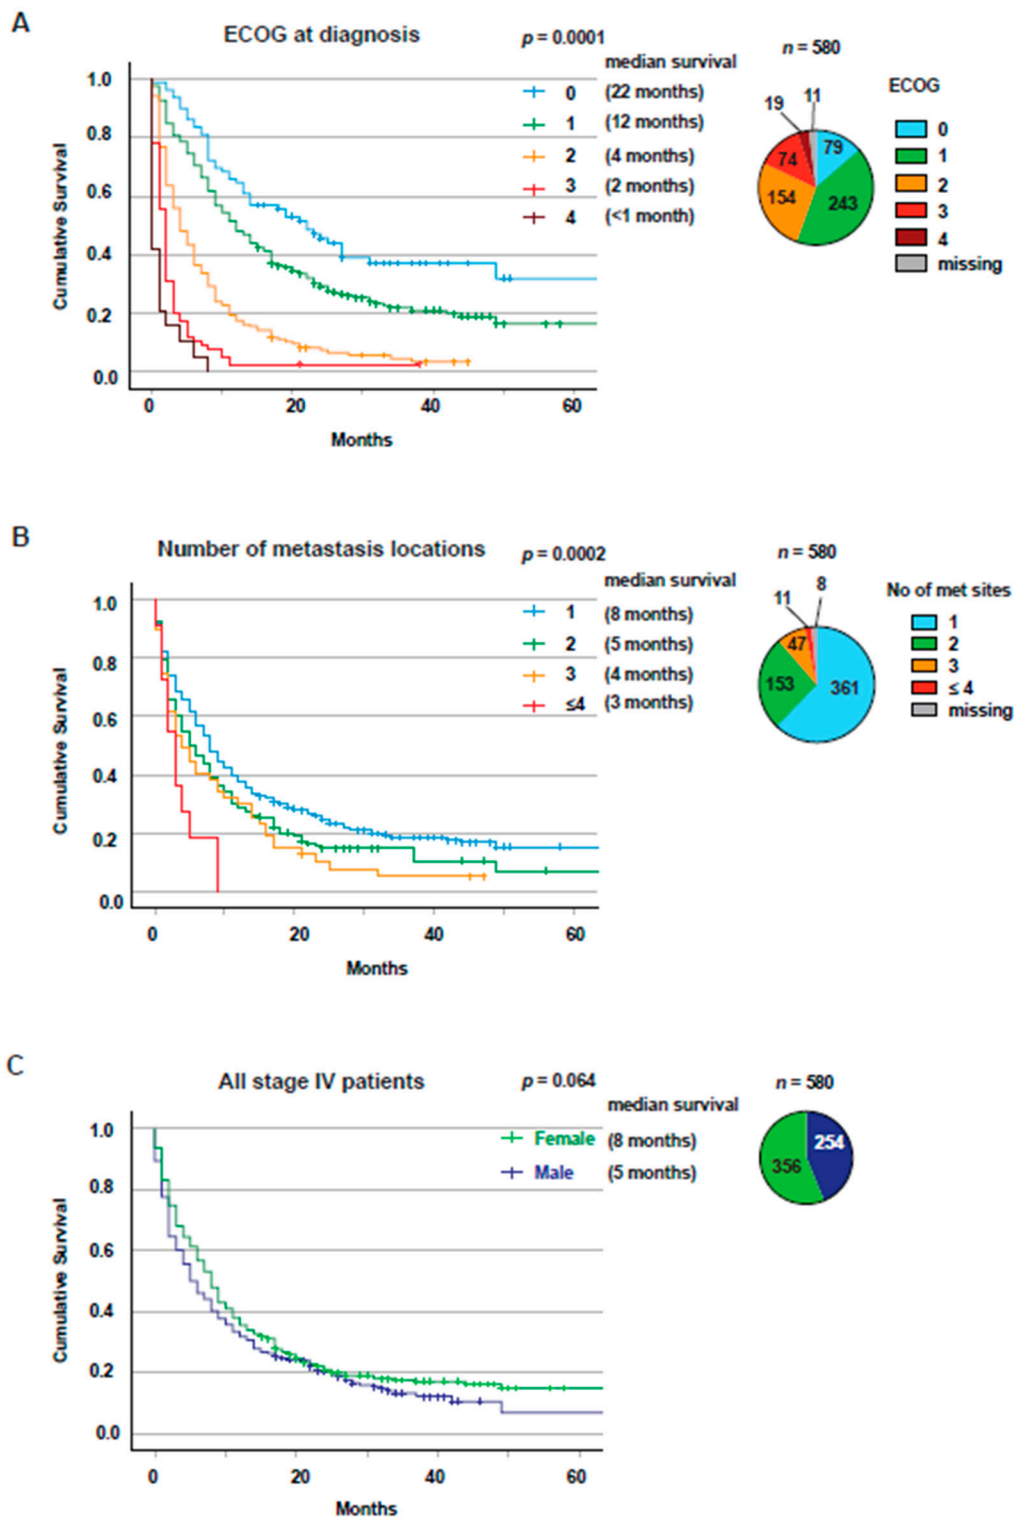

**Figure S1.** (A). Kaplan-Meier estimates comparing overall survival for the full cohort stratified on ECOG PS. Pie chart showing patient distribution between ECOG stages. (B). Kaplan-Meier estimates comparing overall survival for the full cohort stratified on number of metastasis locations. Pie chart showing patient distribution between number of metastasis locations. (C). Kaplan-Meier estimates comparing overall survival for the full cohort stratified on gender. Pie chart showing patient distribution between male and female. ECOG: Eastern Cooperative Oncology Group; PS: Performance Status.

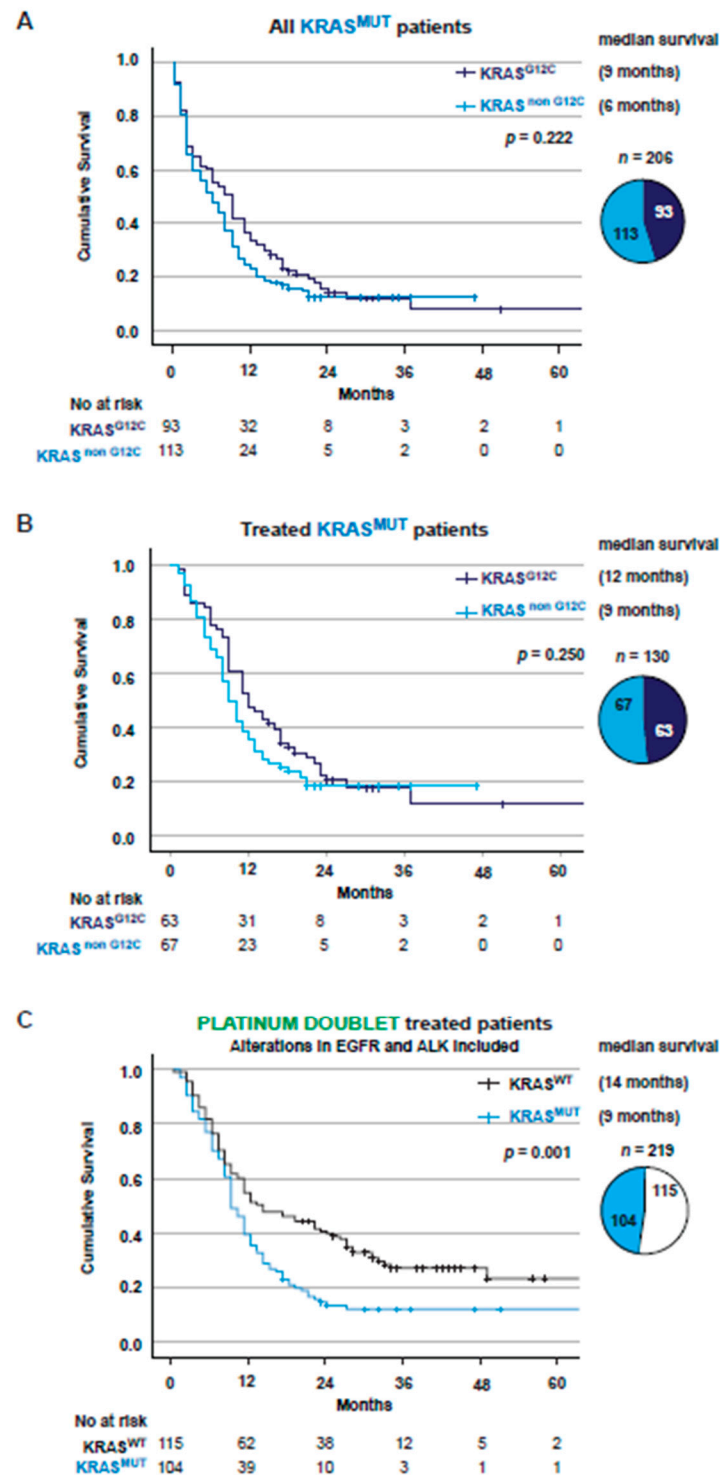

**Figure S2.** (A). Kaplan–Meier estimates comparing overall survival for all KRAS<sup>MUT</sup> stratified on KRAS<sup>G12C</sup> vs. KRAS<sup>non G12C</sup>. Pie chart showing patient distribution between KRAS<sup>G12C</sup> and KRAS<sup>non G12C</sup>. (B). Kaplan–Meier estimates comparing overall survival for all KRAS<sup>MUT</sup> patients receiving treatment with platinum doublet stratified on KRAS<sup>G12C</sup> vs. KRAS<sup>non G12C</sup>. Pie chart showing patient distribution between KRAS<sup>G12C</sup> and KRAS<sup>non G12C</sup>. (C). Kaplan–Meier estimates comparing overall survival for all receiving treatment with platinum doublet stratified on KRAS<sup>WT</sup> vs. KRAS<sup>MUT</sup>. Pie chart showing patient distribution between KRAS<sup>WT</sup> and KRAS<sup>MUT</sup>

**Table S1.** (Related to Figure S2C), Characteristics of all PT treated patients.

| <b>Characteristics all Platinum Doublet treated</b> | <b>WT</b>    | <b>KRAS MUT</b> |
|-----------------------------------------------------|--------------|-----------------|
|                                                     | <i>n</i> (%) | <i>n</i> (%)    |
| Total <i>n</i> = 219                                | 115 (52,5)   | 104 (47,5)      |
| Age in years, median (range)                        | 69 (24–84)   | 70 (35–83)      |
| <i>Sex</i>                                          |              |                 |
| Male                                                | 49 (42,6)    | 35 (33,7)       |
| Female                                              | 66 (57,4)    | 69 (66,3)       |
| <i>Smoking history</i>                              |              |                 |
| Current smoker                                      | 38 (33,0)    | 37 (35,6)       |
| Former smoker                                       | 53 (46,1)    | 60 (57,7)       |
| Never smoker                                        | 23 (20,0)    | 7 (6,7)         |
| Missing                                             | 1 (0,9)      | 0               |
| <i>Performance status</i>                           |              |                 |
| ECOG 0                                              | 22 (19,1)    | 24 (23,1)       |
| ECOG 1                                              | 66 (57,4)    | 60 (57,7)       |
| ECOG 2                                              | 25 (21,7)    | 20 (19,2)       |
| ECOG 3                                              | 2 (1,7)      | 0               |
| ECOG 4                                              | 0            | 0               |
| Missing                                             | 0            | 0               |
| <i>Histology</i>                                    |              |                 |
| Adenocarcinoma                                      | 94 (81,8)    | 88 (8,6)        |
| NSCLC NOS                                           | 9 (7,8)      | 15 (14,4)       |
| Squamous cell carcinoma                             | 12 (10,4)    | 1 (1,0)         |
| <i>Mutation status</i>                              |              |                 |
| None known                                          | 77 (67,0)    |                 |
| ALK                                                 | 6 (5,2)      |                 |
| EGFR                                                | 18 (15,7)    |                 |
| BRAF                                                | 6 (5,2)      |                 |
| Other                                               | 6 (5,2)      |                 |
| 1RET                                                | 2 (1,7)      |                 |
| <i>KRAS submutation</i>                             |              |                 |
| G12A                                                |              | 6 (5,8)         |
| G12C                                                |              | 46 (44,2)       |
| G12D                                                |              | 10 (9,6)        |
| G12V                                                |              | 20 (19,2)       |
| Others                                              |              | 22 (19,2)       |
| <i>At last follow up</i>                            |              |                 |
| Alive                                               | 32 (27,8)    | 14 (13,5)       |
| Deceased                                            | 83 (72,2)    | 90 (86,5)       |
| <i>Survival</i>                                     |              |                 |
| Median survival (months)                            | 14           | 9               |
| <i>No. of metastatic locations at diagnosis</i>     |              |                 |
| 1                                                   | 79 (68,7)    | 72 (69,2)       |
| 2                                                   | 26 (22,6)    | 22 (57,7)       |
| 3                                                   | 6 (5,2)      | 7 (6,7)         |
| >3                                                  | 1 (0,9)      | 3 (2,9)         |
| Missing                                             | 3 (2,6)      | 0               |

**Table S2.** (Related to Figure 5A). Characteristics of all patients treated with first-line ICB.

| <b>Characteristics Immune checkpoint blockade monotherapy</b> | <b>WT</b>            | <b>KRAS</b>          |
|---------------------------------------------------------------|----------------------|----------------------|
|                                                               | <i>n</i> (%)         | <i>n</i> (%)         |
| Total <i>n</i> = 37                                           | <i>n</i> = 17(45,9 ) | <i>n</i> = 20 (54,1) |
| Age in years, median (range)                                  | 70 (57–83)           | 69 (46–78)           |
| <i>Sex</i>                                                    |                      |                      |
| Male                                                          | 6 (35,3)             | 12 (60)              |
| Female                                                        | 11 (64,7)            | 8 (40)               |
| <i>Smoking history</i>                                        |                      |                      |
| Current smoker                                                | 7 (41,2)             | 7 (35)               |
| Former smoker                                                 | 9 (52,9)             | 12 (60)              |
| Never smoker                                                  | 1 (5,9)              | 1 (5)                |
| Missing                                                       | 0                    | 0                    |
| <i>Performance status</i>                                     |                      |                      |
| ECOG 0                                                        | 3 (17,6)             | 4 (20)               |
| ECOG 1                                                        | 8 (47,1)             | 13 (65)              |
| ECOG 2                                                        | 6 (35,3)             | 3 (15)               |
| ECOG 3                                                        | 0                    | 0                    |
| ECOG 4                                                        | 0                    | 0                    |
| Missing                                                       | 0                    | 0                    |
| <i>Histology</i>                                              |                      |                      |
| Adenocarcinoma                                                | 14 (82,4)            | 19 (95)              |
| NSCLC NOS                                                     | 2 (11,8)             | 1 (5)                |
| Squamous cell carcinoma                                       | 1 (5,9)              | 0                    |
| <i>Mutation status</i>                                        |                      |                      |
| None known                                                    | 14 (82,4)            |                      |
| ALK                                                           | 0                    |                      |
| EGFR                                                          | 1 (5,9)              |                      |
| BRAF                                                          | 1 (5,9)              |                      |
| NRAS                                                          | 1 (5,9)              |                      |
| ROS1                                                          | 0                    |                      |
| RET                                                           | 0                    |                      |
| <i>KRAS submutation</i>                                       |                      |                      |
| G12A                                                          |                      | 2 (10)               |
| G12C                                                          |                      | 8 (40)               |
| G12D                                                          |                      | 1 (5)                |
| G12V                                                          |                      | 2 (10)               |
| G13D                                                          |                      | 2 (10)               |
| Q61H                                                          |                      | 2 (10)               |
| Other                                                         |                      | 3 (15)               |
| <i>PD-L1 status</i>                                           |                      |                      |
| High TPS ≥50%                                                 | 13 (76,5)            | 20 (100)             |
| Low TPS 1–49%                                                 | 3 (17,6)             | 0                    |
| Missing                                                       | 1 (5,9)              | 0                    |
| <i>At last follow up</i>                                      |                      |                      |
| Alive                                                         | 2 (11,8)             | 10 (50)              |
| Deceased                                                      | 15 (88,2)            | 10 (50)              |
| <i>Survival</i>                                               |                      |                      |
| Median survival (months)                                      | 6                    | 23                   |
| <i>No. of metastatic locations at diagnosis</i>               |                      |                      |
| 1                                                             | 14 (82,4)            | 10 (50)              |
| 2                                                             | 2 (11,8)             | 9 (45)               |
| 3                                                             | 1 (5,9)              | 1 (5)                |

**Table S3.** Multivariate analyses.

|                                   | <b>ALL STAGE IV</b> | <b>95%CI</b> | <b><i>p</i></b> |
|-----------------------------------|---------------------|--------------|-----------------|
|                                   | <b>HR</b>           |              |                 |
| KRAS mutation                     | 1.472               | 1.207–1.769  | <0.001          |
| ECOG >1                           | 3.175               | 2.622–3.845  | <0.001          |
| Gender (female)                   | 0.840               | 0.700–1.008  | 0.061           |
| Smoking                           | 1.021               | 0.803–1.297  | 0.867           |
| All PT with EGFR and ALK excluded |                     |              |                 |
|                                   | <b>HR</b>           | <b>95%CI</b> | <b><i>p</i></b> |
| KRAS mutation                     | 1.564               | 1.124–2.177  | 0.008           |
| ECOG >1                           | 1.906               | 1.307–7.779  | <0.001          |
| Gender (female)                   | 0.957               | 0.690–1.328  | 0.794           |
| Smoking                           | 1.089               | 0.608–1.952  | 0.774           |
| All ICB treated                   |                     |              |                 |
|                                   | <b>HR</b>           | <b>95%CI</b> | <b><i>p</i></b> |
| KRAS mutation                     | 0.349               | 0.148–0.822  | 0.016           |
| ECOG >1                           | 0.389               | 0.165–0.963  | 0.041           |
| Gender (male)                     | 1.459               | 0.637–3.343  | 0.372           |
| Smoking                           | 1.263               | 0.165–9.658  | 0.882           |
| KRAS MUT PD-L1 status             |                     |              |                 |
|                                   | <b>HR</b>           | <b>95%CI</b> | <b><i>p</i></b> |
| PD-L1                             | 0.993               | 0.986–0.999  | 0.028           |
| ECOG >1                           | 2.470               | 1.470–4.273  | 0.001           |
| Gender (male)                     | 1.026               | 0.632–1.166  | 0.918           |
| Smoking                           | 1.212               | 0.421–3.491  | 0.721           |
| KRAS WT PD-L1 status              |                     |              |                 |
|                                   | <b>HR</b>           | <b>95%CI</b> | <b><i>p</i></b> |
| PD-L1                             | 1.001               | 0.995–1.007  | 0.780           |
| ECOG >1                           | 2.865               | 1.938–4.236  | <0.001          |
| Gender (female)                   | 0.926               | 0.642–1.343  | 0.918           |
| Smoking                           | 0.743               | 0.473–1.168  | 0.198           |
